# Supplementary material
Source: PubMed Central journal article supplement (PMC7348550)
Supplement: JB.00191-20-s0001.pdf [file JB.00191-20-s0001.pdf]

1 **Distinct pathways carry out  $\alpha$  and  $\beta$  galactosylation of secondary cell wall polysaccharide**  
2 **in *Bacillus anthracis* - SUPPLEMENTARY INFORMATION**

3

4 Alice Chateau<sup>a\*</sup>, So Young Oh<sup>a</sup>, Anastasia Tomatsidou<sup>a</sup>, Inka Brockhausen<sup>b</sup>, Olaf  
5 Schneewind<sup>a†</sup>, Dominique Missiakas<sup>a,c#</sup>

6

7 <sup>a</sup>Howard Taylor Ricketts Laboratory, Argonne National Laboratory, Lemont, Illinois, USA

8 <sup>b</sup>Department of Biomedical and Molecular Sciences, Queen's University, Kingston, Ontario,  
9 Canada

10 <sup>c</sup>Department of Microbiology, University of Chicago, Chicago, Illinois, USA

11

12 Running Head: Glycosyltransferases of *Bacillus anthracis*

13

14 \*Present address: INRAE, Avignon Université, UMR SQPOV, F-84914 Avignon, France

15 #Address correspondence to Dominique Missiakas, [dmissiak@bsd.uchicago.edu](mailto:dmissiak@bsd.uchicago.edu)

16 † Deceased 26 May 2019

17

18

19 **Table S1.** List of oligonucleotides used in this study.

| Oligonucleotide     | Sequence                                                  | Purpose                                          |
|---------------------|-----------------------------------------------------------|--------------------------------------------------|
| UpF-BAS5280-SacI    | aaagagctcCTCTTTCATTCATGGGGTTGACG                          | Cloning 1 kbp upstream of <i>gtsE</i> in pLM4    |
| upR-BAS5280-NheI    | ttagctagcATCATCACGTCTGCCACAAGTAGCC                        | Cloning 1 kbp upstream of <i>gtsE</i> in pLM4    |
| downF-BAS5280-NheI  | aaagctagcCGCTTACGCGGAATTGTTTCGTGGA                        | Cloning 1 kbp downstream of <i>gtsE</i> in pLM4  |
| downR-BAS5280-XmaI  | aaacccgggGTTGCTGTGTAACGCGTCATTTTTGTG                      | Cloning 1 kbp downstream of <i>gtsE</i> in pLM4  |
| BAS5280 ExF         | GCTTTATCATCCTTTGTGCTC                                     | Validate <i>gtsE</i> allelic replacement         |
| BAS5280-ExR         | GCCAGTCGTTGAGTAACGAGC                                     | Validate <i>gtsE</i> allelic replacement         |
| pJK4-5280F-XbaI-TTG | aaatctagaTTGAAATTTTCTTTAATCATGGCTACT                      | Cloning of <i>gtsE</i> in pJK4                   |
| pJK4-5280R-KpnI     | aaaggtaccTTATTTTAAATATCCACGAACAATTCCGCG                   | Cloning of <i>gtsE</i> in pJK4                   |
| 5280R-His-KpnI      | aaaggtaccTTAgTGATGATGATGATGATGTTTTAAATATCCACGAACAATTCCGCG | Appending 6 histidines at the C-terminus of GtsE |
| BAS5280D86A-F       | TTATCGCTTTTCCAGcTGATGATTGTATTTATG                         | Generate GtsE D86A                               |
| BAS5280D86A-R       | CATAAATACAATCATCAgCTGGAAAAGCGATAA                         | Generate GtsE D86A                               |
| BAS5280D162A-F      | GATGTAGGTACATTTGcTGAAGATTTAGGTGTTGG                       | Generate GtsE D162A                              |
| BAS5280D162A-R      | CCAACACCTAAATCTTCaGCAAATGTACCTACATC                       | Generate GtsE D162A                              |
| BAS5286-upF-EcoRI   | aaagaattcGCCCAGGCTAATAACAGTATTGTAC                        | Cloning 1 kbp upstream of <i>gtsB</i> in pLM4    |
| BAS5286-upR-NheI    | ttagctagcGAGTTTCTCCATAATAGTATCCTCAAC                      | Cloning 1 kbp upstream of <i>gtsB</i> in pLM4    |
| BAS5286-downF-NheI  | aaagctagcTAAACTGAAACAATTTATTAATAAATACGAGGATAC             | Cloning 1 kbp downstream of <i>gtsB</i> in pLM4  |
| BAS5286-downR-XmaI  | aaacccgggGTGCAGTCTCTTCTTGGTCAATGTTGATTG                   | Cloning 1 kbp downstream of <i>gtsB</i> in pLM4  |
| ExF86               | CATCCATATCGCTAAGGCTATAATTGGC                              | Validate <i>gtsB</i> allelic replacement         |
| ExR86               | GAGGCAGAAATGAGGTTGCCAAATCC                                | Validate <i>gtsB</i> allelic replacement         |
| BAS5286F-XbaI       | aaatctagaATGGAGAAACTCTTAAAGTTTGGTTTAGTAGGG                | Cloning <i>gtsB</i> in pJK4                      |
| BAS5286R-KpnI       | aaaggtaccTTAATTAGTAGCCTTTTCCGTTTGGTTGATG                  | Cloning <i>gtsB</i> in pJK4                      |
| BAS5286-NdeI        | aaacatagGAGAAACTCTTAAAGTTTGGTTTAGTAGGG                    | Cloning <i>gtsB</i> in pWWW412                   |
| BAS5286-XhoI        | aaactcgagTTAATTAGTAGCCTTTTCCGTTTGGTTGATG                  | Cloning <i>gtsB</i> in pWWW412                   |
| BAS5284-upF-XmaI    | taacccgggCATTCCCTAGCTTAGACCAACATCA                        | Cloning 1 kbp upstream of <i>gtsD</i> in pLM4    |
| BAS5284-upR-NheI    | ttagctagcGCCATTCTTCCAGCCCATTCA                            | Cloning 1 kbp upstream of <i>gtsD</i> in pLM4    |
| BAS5285-upF-SacI    | aaagagctcCCTGTGCTACTTCTTCCCTCGAAG                         | Cloning 1 kbp upstream of <i>gtsC</i> in pLM4    |
| BAS5285-upR-NheI    | ttagctagcTCAAGATATAGCGATCCACTGCTAAG                       | Cloning 1 kbp upstream of <i>gtsC</i> in pLM4    |
| BAS5285-downF-NheI  | ttagctagcAGCTGCTTTTGGCATTAAAGCATATTTAC                    | Cloning 1 kbp downstream of <i>gtsC</i> in pLM4  |
| BAS5285-downR-XmaI  | taacccgggGCCACATTCCTATTTTATCTTGGATTTTAC                   | Cloning 1 kbp downstream of <i>gtsC</i> in pLM4  |
| BAS5285F-XbaI       | aaatctagaTTGGAACGTTTTTCTGGATTATTTTCAAC                    | Cloning <i>gtsC</i> in pJK4                      |
| BAS5285R-KpnI       | aaaggtaccTTATATTCTTTTTTTATTGTAATATGCTTAAATGCAAAAGCAGC     | Cloning <i>gtsC</i> in pJK4                      |
| BAS5284-ExF         | GGTGACTTCTTAAATCCATCATACTTTCGAGC                          | Validate <i>gtsCD</i> allelic replacement        |
| BAS5285-ExF         | CCATTGTACGATCTGTACTACCGTC                                 | Validate <i>gtsCD</i> allelic replacement        |
| BAS5285-ExR         | GTTATTTCGGCGAAGGACCTTTCC                                  | Validate <i>gtsCD</i> allelic replacement        |
| 5287-upF-sacI       | aaagagctcCGGATCAATCTTATATGTAACAATCCATGCAG                 | Cloning 1 kbp upstream of <i>gtsA</i> in pLM4    |

|                   |                                                               |                                                    |
|-------------------|---------------------------------------------------------------|----------------------------------------------------|
| 5287upR           | GCAGTCTCTTCTTGGTCAATGTTGgctagcTCCTGTG<br>CTACTTCTTCCTCGAAGTAC | Cloning 1 kbp upstream of <i>gtsA</i> in pLM4      |
| 5287downF-overlap | GGAAGAAGTAGCACAGGAgctagcCAACATTGACCA<br>AGAAGAGACTGCAC        | Cloning 1 kbp downstream of <i>gtsA</i> in<br>pLM4 |
| 5287downR-XmaI    | taaccgggCTGACTGATTGGTCAGCCGTCAATG                             | Cloning 1 kbp downstream of <i>gtsA</i> in<br>pLM4 |
| 5287-ExF          | CTCACTCCACCAATTCGTCTAGC                                       | Validate <i>gtsA</i> allelic replacement           |
| 5287-ExR          | CCCTGCAATGGTAACGATAATGGTTAG                                   | Validate <i>gtsA</i> allelic replacement           |
| 5287F-NdeI        | aaacatatgCAAAAATTAATCTCGGTTGTAGTTCC                           | Cloning <i>gtsA</i> in pWWW412                     |
| 5287R-XhoI        | AAACTCGAGTTATGCATTCACTTTTTCTTTTTTCA<br>GTGCAG                 | Cloning <i>gtsA</i> in pWWW412                     |
| 5287F-XbaI        | aaatctagaATGCAAAAATTAATCTCGGTTGTAGTTCC                        | Cloning <i>gtsA</i> in pJK4 and pLM5               |
| 5287R-KpnI        | aaaggtagcTTATGCATTCACTTTTTCTTTTTTCAGTGC<br>AG                 | Cloning <i>gtsA</i> in pJK4 and pLM5               |

---

20 Lower cases depict sequences of enzyme restriction sites used for cloning.

21

22
